# Supplementary material for: Face recognition via edge-based Gabor feature representation for plastic surgery-altered images
Source: Springer Nature journal article supplement (doi:10.1186/1687-6180-2014-102), 2014-07-05

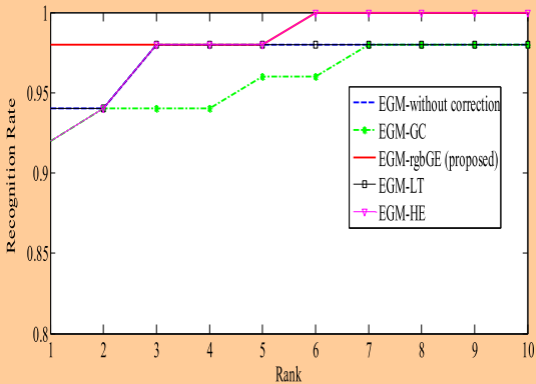

Supplement: 13634_2013_673_MOESM11_ESM.pdf [file 13634_2013_673_MOESM11_ESM.pdf]
